# Supplementary material for: Online Recruitment: Feasibility, Cost, and Representativeness in a Study of Postpartum Women
Source: PubMed Central journal article supplement (PMC5362693; doi:10.2196/jmir.5745), 2017-03-08
Supplement: jmir_v19i3e61_app1.pdf [file jmir_v19i3e61_app1.pdf]

Multimedia Appendix 1. Descriptive data, and univariate and multivariate models predicting the odds of being from the online LYBS sample (versus HILDA sample).

|                                      | Descriptive frequency data |                         | Logistic Regression |                                  |
|--------------------------------------|----------------------------|-------------------------|---------------------|----------------------------------|
|                                      | LYBS (n=1083)              | HILDA (n=579)           | Univariate model    | Multivariate model               |
|                                      | % (95% CI)                 | % (95% CI)              | Odds Ratio (95% CI) | Odds Ratio (95% CI) <sup>a</sup> |
| State                                |                            |                         |                     |                                  |
| New South Wales                      | 27.7 (25.0-30.4)           | 30.6 (26.8-34.4)        | Ref                 | Ref                              |
| Victoria & Tasmania                  | 22.5 (20.1-25.0)           | 24.2 (20.7-27.7)        | 1.03 (.78-1.36)     | .91 (.67-1.24)                   |
| Queensland                           | 25.3 (22.7-27.9)           | 23.5 (20.1-27.0)        | 1.19 (.90-1.57)     | 1.00 (.73-1.37)                  |
| South Australia & Northern Territory | 6.3 (4.9-7.8)              | 8.1 (5.9-10.3)          | .86 (.57-1.30)      | .79 (.50-1.26)                   |
| Western Australia                    | 10.5 (8.7-12.3)            | 10.7 (8.2-13.2)         | 1.08 (.75-1.55)     | 1.08 (.72-1.62)                  |
| Australian Capital Territory         | <b>7.8 (6.2-9.5)</b>       | <b>2.9 (1.5-4.3)</b>    | 2.99 (1.71-5.23)**  | 3.09 (1.70-5.64)**               |
| Remoteness                           |                            |                         |                     |                                  |
| Major City                           | 71.3 (68.6-74.0)           | 71.3 (67.6-75.0)        | Ref                 | Ref                              |
| Inner Regional                       | 19.0 (16.7-21.3)           | 19.0 (15.8-22.2)        | 1.0 (.77-1.30)      | .91 (.67-1.22)                   |
| Outer Regional                       | 7.1 (5.6-8.6)              | 8.7 (6.4-11.0)          | .82 (.56-1.20)      | .74 (.48-1.14)                   |
| Remote/ Very Remote                  | <b>2.5 (1.6-3.4)</b>       | <b>1.0 (.2-1.8)</b>     | 2.57 (1.03-6.4)*    | 2.42 (.91-6.45)                  |
| English only at home                 |                            |                         |                     |                                  |
| No                                   | <b>10.4 (8.6-12.2)</b>     | <b>25.8 (22.2-29.4)</b> | Ref                 | Ref                              |
| Yes                                  | <b>89.6 (87.8-91.4)</b>    | <b>74.2 (70.6-77.8)</b> | 2.99 (2.29-3.92)**  | 3.26 (2.40-4.43)**               |
| Age categories                       |                            |                         |                     |                                  |
| 18-24                                | 16.9 (14.7-19.1)           | 13.3 (10.5-16.1)        | Ref                 | Ref                              |

|                                     |                         |                         |                    |                    |
|-------------------------------------|-------------------------|-------------------------|--------------------|--------------------|
| 25-29                               | <b>31.7 (28.9-34.5)</b> | <b>24.0 (20.5-27.5)</b> | 1.05 (.75-1.46)    | .88 (.59-1.13)     |
| 30-34                               | 33.6 (30.8-36.4)        | 37.0 (33.1-40.9)        | .72 (.53-.99)*     | .67 (.44-1.01)     |
| 35-39                               | <b>14.3 (12.2-16.4)</b> | <b>20.6 (17.3-23.9)</b> | .55 (.39-.79)*     | .52 (.33-.82)**    |
| 40+                                 | 3.5 (2.4-4.6)           | 5.0 (5.2-6.8)           | .55 (.32-.96)*     | .71 (.37-1.36)     |
| <b>Relationship status</b>          |                         |                         |                    |                    |
| Married                             | 68.2 (65.4-70.1)        | 71.3 (67.6-75.0)        | Ref                | Ref                |
| De facto relationship               | <b>24.2 (21.6-26.8)</b> | <b>16.8 (13.8-19.9)</b> | 1.52 (1.17-1.97)*  | 1.22 (0.89-1.66)   |
| Divorced/separated                  | 2.8 (1.8-3.8)           | 3.1 (1.7-4.5)           | .94 (.52-1.72)     | .98 (.50-1.92)     |
| Never married/not de facto          | <b>4.9 (3.6-6.2)</b>    | <b>8.8 (6.5-11.1)</b>   | .58 (.39-.87)*     | .38 (.23-.61)**    |
| <b>Number of children</b>           |                         |                         |                    |                    |
| 1                                   | <b>60.4 (57.5-63.3)</b> | <b>43.9 (39.9-47.9)</b> | Ref                | Ref                |
| 2                                   | <b>28.0 (25.3-30.7)</b> | <b>38.1 (34.4-42.1)</b> | .53 (.43-.67)**    | .53 (.41-.68)**    |
| 3+                                  | <b>11.6 (9.7-13.5)</b>  | <b>18.0 (14.9-21.1)</b> | .46 (.35-.63)**    | .47 (.33-.66)**    |
| <b>Education</b>                    |                         |                         |                    |                    |
| Incomplete high school              | <b>8.5 (6.8-10.2)</b>   | <b>14.0 (11.2-16.8)</b> | Ref                | Ref                |
| Completed high school               | 43.6 (40.7-46.6)        | 41.8 (37.8-45.8)        | 1.71 (1.22-2.40)*  | 1.90 (1.29-2.81)*  |
| Completed bachelor                  | 47.7 (44.7-50.7)        | 44.2 (40.2-48.3)        | 1.77 (1.27-2.47)*  | 2.49 (1.63-3.80)** |
| <b>Self-rated general health</b>    |                         |                         |                    |                    |
| Excellent                           | <b>11.2 (9.3-13.1)</b>  | <b>16.0 (13.0-19.0)</b> | Ref                | Ref                |
| Very good                           | 41.2 (38.3-44.1)        | 44.8 (40.8-48.9)        | 1.32 (.97-1.80)    | 1.11 (.079-1.56)   |
| Good                                | 33.4 (30.6-36.2)        | 33.5 (29.7-37.3)        | 1.43 (1.04-1.97)*  | 1.02 (.70-1.47)    |
| Fair/Poor                           | <b>14.2 (12.1-16.3)</b> | <b>5.9 (4.0-7.8)</b>    | 3.48 (2.20-5.52)** | 2.66 (1.57-4.50)** |
| <b>Psychological distress (K10)</b> |                         |                         |                    |                    |
| Low                                 | <b>45.8 (42.8-48.8)</b> | <b>68.5 (64.7-72.3)</b> | Ref                | Ref                |
| Moderate                            | <b>29.7 (27.0-32.4)</b> | <b>18.1 (15.0-21.2)</b> | 2.45 (1.90-3.17)** | 2.73 (1.86-3.28)** |

|           |                         |                       |                     |                    |
|-----------|-------------------------|-----------------------|---------------------|--------------------|
| High      | <b>14.8 (12.7-16.9)</b> | <b>9.7 (7.3-12.1)</b> | 2.28 (1.64-.3.19)** | 2.03 (1.39-2.97)** |
| Very high | <b>9.7 (7.9-11.5)</b>   | <b>3.7 (2.2-5.2)</b>  | 4.05 (2.48-6.12)**  | 3.92 (2.26-6.78)** |

Note: LYBS: Living with a Young Baby Survey. HILDA: Household Income Labour Dynamics in Australia (HILDA) Study. CI: Confidence Interval. K10: Kessler Psychological Distress Scale. SD: Standard Deviation. OR: Odds Ratio. K10: Kessler Psychological Distress Scale. Bold figures indicate significant differences between observed and expected cell values ( $p < .05$ ) using chi-square tests (determined with an adjusted residual score  $< -2.00$  or  $> 2.00$ . [21]). COLUMNS 3 and 4: \*  $p < .05$ ; \*\*  $p < .001$ . a: Cox & Snell  $R^2 = .156$ .
